# Supplementary material for: Defect-rich boron doped carbon nanotubes as an electrocatalyst for hybrid Li–air batteries
Source: Royal Society of Chemistry journal article supplement (doi:10.1039/d1cy01832a), 2021-11-19
Supplement: d1cy01832a1.pdf [file d1cy01832a1.pdf]

Supplementary information

**Defect-Rich Boron doped Carbon Nanotube as  
Electrocatalyst for Hybrid Li-air Battery**

Yuyang Wang,<sup>a</sup> Mingfu Yu,<sup>a</sup> Tianyu Zhang,<sup>a</sup> Zhichao Xue,<sup>b</sup> Ying Ma<sup>c</sup> and Hong Sun\*<sup>a</sup>

---

a. School of Mechanical Engineering, Shenyang Jianzhu University, 110168  
Shenyang, China. Email: sunhongwxh@sina.com

b. School of Science, Shenyang Jianzhu University, 110168 Shenyang, China

c. School of Material Science and Engineering, Shenyang Jianzhu University,  
110168 Shenyang, China

**Corresponding author:** [sunhongwxh@sina.com](mailto:sunhongwxh@sina.com)

## Catalogue:

1. Experimental preparation
2. Calculation of DFT
3. Analysis of experimental results

### 1. Experimental preparation

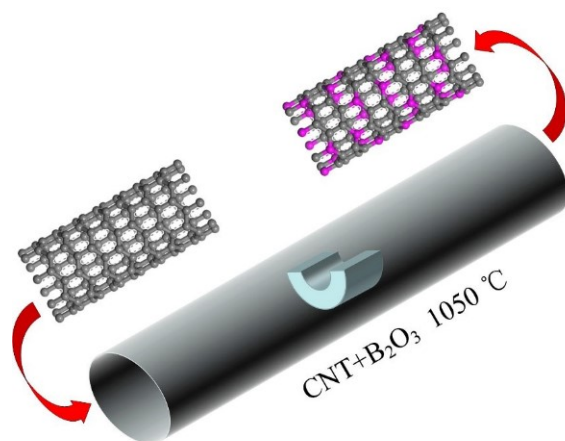

Fig.S1 Schematic illustration of synthesis process of BC<sub>3</sub>NT.

Table S1 List of chemicals

| Name                          | Purity | Manufacturer                                           |
|-------------------------------|--------|--------------------------------------------------------|
| LiOH                          | 95%    | Sinopharm Group                                        |
| CNT                           | 99.9%  | Beijing Deke Daojin Science and<br>Technology Co., LTD |
| PTFE                          |        | Sinopharm Group                                        |
| NMP                           | AR     | Sinopharm Group                                        |
| B <sub>2</sub> O <sub>3</sub> | 99%    | Sinopharm Group                                        |
| LISICON                       |        | Shenzhen Kejing Star Technology<br>Co.                 |
| LITFSI-TEGDME                 |        | NJ Scientific.                                         |

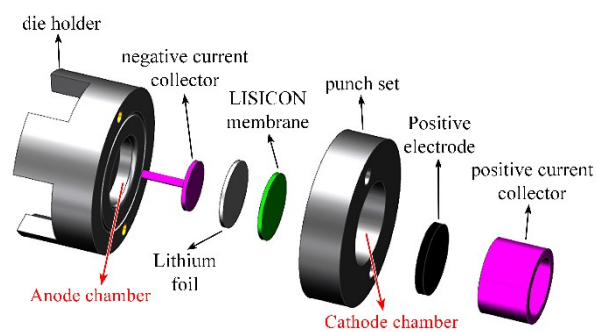

Fig. S2 Illustrate of HLAB mold.

## 2. Calculation of DFT

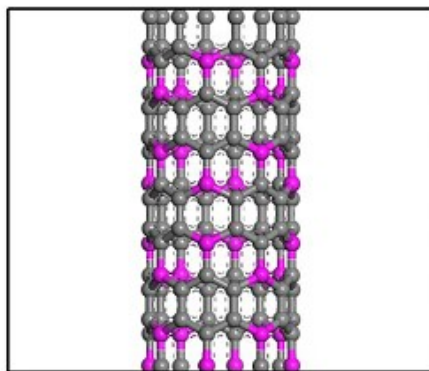

Fig. S3 Model of nanotube.

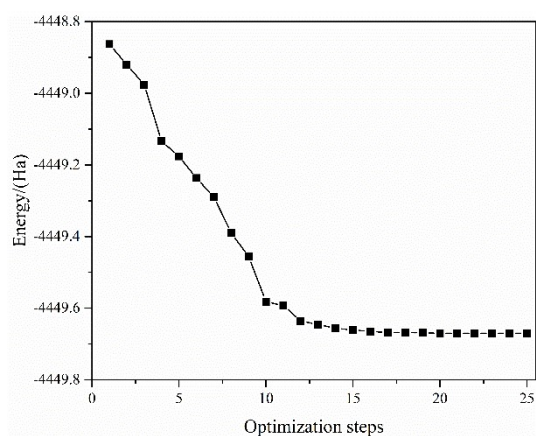

Fig. S4 Energy convergence diagram of optimization process.

Under alkaline conditions, the ORR and OER four-electron reaction path is in the ESI. †

$$O_2(g) + H_2O(l) + e^- + * \rightarrow OO H^* + OH^- \quad (S1)$$
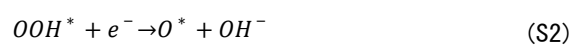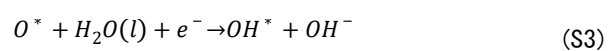

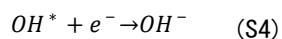

\* represents the active site on the catalyst surface, and (l) and (g) represent the liquid and gas phases, respectively.

The OER reaction path is opposite to the ORR reaction path :

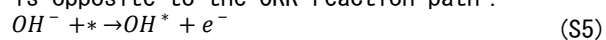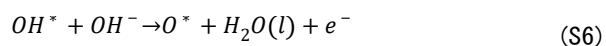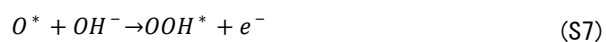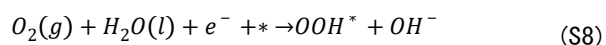

### 3. Analysis of experimental results

Table S2 Content of element

|   | B <sub>2</sub> O <sub>3</sub> : CNT=2:1 | B <sub>2</sub> O <sub>3</sub> : CNT=5:1 | B <sub>2</sub> O <sub>3</sub> : CNT=8:1 |
|---|-----------------------------------------|-----------------------------------------|-----------------------------------------|
| C | 92.20%                                  | 87.86%                                  | 88.58%                                  |
| B | 2.84%                                   | 4.68%                                   | 5.15%                                   |
| O | 4.10%                                   | 5.83%                                   | 2.98%                                   |

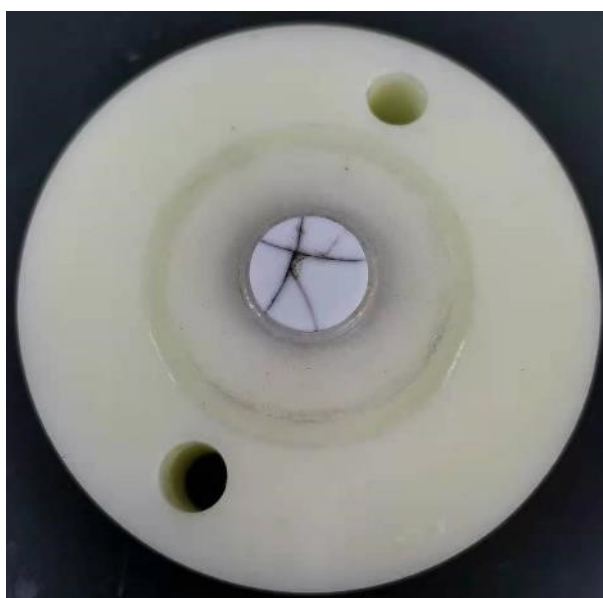

Fig. S5 LISICON membrane after test.

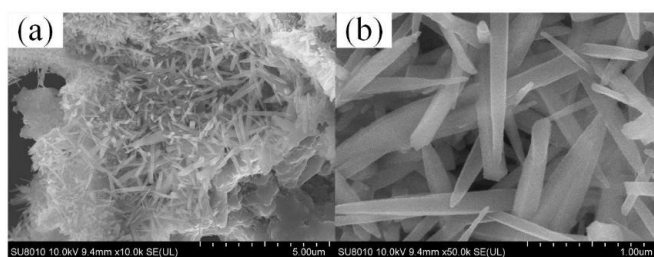

Fig. S6 Lithium dendrites.

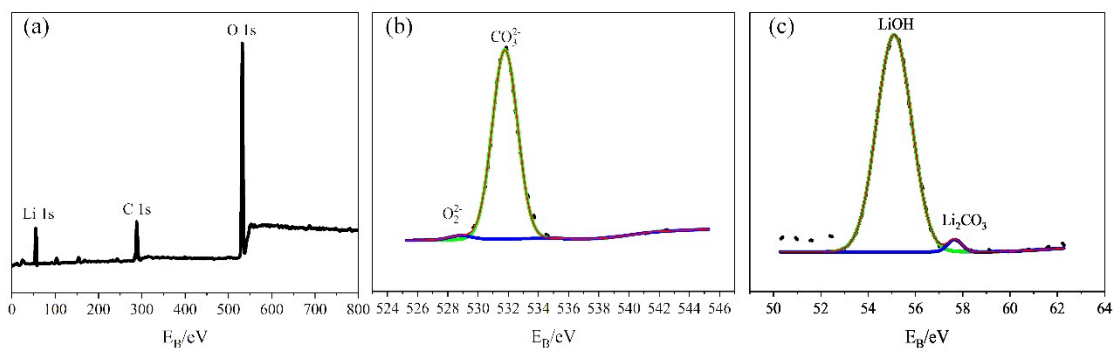

Fig. S7 XPS spectrum: (a) Total, (b) O 1s, (c) Li 1s.

Table S3 Comparison of battery performance

| Catalyst                       | Cycling number | Initial discharge capacity (mAh·g <sup>-1</sup> ) | Overpotential (V)  | Ref               |
|--------------------------------|----------------|---------------------------------------------------|--------------------|-------------------|
| Boron doped CNT                | 165            | 8900                                              | 0.3                | This work         |
| Pt-carbon paper                | 50             |                                                   | 0.75               | Sun <sup>1</sup>  |
| MNO-CNT-CNFFs                  | 21             |                                                   | 0.15 (low current) | Ji <sup>2</sup>   |
| Mn <sub>3</sub> O <sub>4</sub> | 20             | 221 (0.5 mA·cm <sup>-2</sup> )                    | 1.3                | Li <sup>3</sup>   |
| Graphite                       |                |                                                   | 0.47               | Zhou <sup>4</sup> |

- (1) Sun, Y. Lithium Ion Conducting Membranes for Lithium-Air Batteries. *Nano Energy* **2013**, *2* (5), 801-816. <https://doi.org/10.1016/j.nanoen.2013.02.003>.
- (2) Ji, D.; Peng, S.; Safanama, D.; Yu, H.; Li, L.; Yang, G.; Qin, X.; Madhavi, S.; Adams, S.; Ramakrishna, S. Design 3D Hierarchical Architectures of Carbon and Highly Active Transition-Metals (Fe, Co, Ni) as Bifunctional Oxygen Catalysts for Hybrid Lithium-Air Batteries. *Chemistry of Materials* **2017**, *29*. <https://doi.org/10.1021/acs.chemmater.6b05056>.
- (3) Li, L.; Zhao, X.; Manthiram, A. A Dual-Electrolyte Rechargeable Li-Air Battery with Phosphate Buffer Catholyte. *Electrochem. Commun.* **2012**, *14* (1), 78-81. <https://doi.org/10.1016/j.elecom.2011.11.007>.
- (4) Qiao, Y.; Wang, Q.; Mu, X.; Deng, H.; He, P.; Yu, J.; Zhou, H. Advanced Hybrid Electrolyte Li-O<sub>2</sub> Battery Realized by Dual Superlyophobic Membrane. *Joule* **2019**, *3* (12), 2986-3001. <https://doi.org/10.1016/j.joule.2019.09.002>.
